# Supplementary material for: Synchronously improved luminescence efficiency and thermal stability of organic–inorganic chloride single crystals through doping of Sb3+
Source: Royal Society of Chemistry journal article supplement (doi:10.1039/d4nj04101a), 2024-01-01
Supplement: d4nj04101a1.pdf [file d4nj04101a1.pdf]

## Electronic Supplementary Information (ESI)

### Synchronously improved luminescent efficiency and thermal stability of organic-inorganic chloride single crystals through doping of $\text{Sb}^{3+}$

Zongqi Chen,<sup>a</sup> Aibo Li,<sup>a</sup> Yushan Xie,<sup>a</sup> Haoqi Long, Qiang Zhou, <sup>\*a</sup> Long Jiang<sup>b</sup>, Peng Ren,<sup>a</sup> and Zhengliang Wang,<sup>\*a</sup>

<sup>a</sup>) Key Laboratory of Green-chemistry Materials in University of Yunnan Province, Yunnan Key Laboratory of Chiral Functional Substance Research and Application, School of Chemistry & Environment, Yunnan Minzu University, Kunming, 650500, China.

<sup>b</sup>) Instrumental Analysis & Research Center, Sun Yat-Sen (Zhongshan) University, Guangzhou, 510275, China.

**Email:** wzhl@ymu.edu.cn (Z. Wang)

q-zhou@ymu.edu.cn (Q. Zhou)

## **Experimental section**

### **(1) Materials**

All reagents and solvents including  $C_4H_{12}NCl$  (99.9%, Aladdin),  $MnCl_2 \cdot 4H_2O$  (99.9%, Aladdin),  $Sb_2O_3$  (99.9%, Aladdin), HCl aqueous solution (37%, Aladdin), and ethanol (99.5%, Aladdin) were used without further purification. YAG:Ce<sup>3+</sup> phosphors were purchased from Shenzhen Quanjing Photon Co. Ltd.

### **(2) Synthesis of $(CH_3)_4NMnCl_3:xSb^{3+}$ ( $x = 0, 0.2\%, 0.5\%$ , and $1\%$ ) single crystals**

Taking the preparation of  $(CH_3)_4NMnCl_3:0.5\%Sb^{3+}$  as an example, 2 mmol  $MnCl_2 \cdot 4H_2O$  and 0.005 mmol  $Sb_2O_3$  were dissolved in 5 mL of HCl (36 wt %) solution at room temperature to form a transparent precursor solution. Then, 2 mmol  $C_4H_{12}NCl$  was added to the precursor solution with stirring for 4 h. Pink  $(CH_3)_4NMnCl_3:0.5\%Sb^{3+}$  rod crystals grew up from this solution after one week at room temperature.

### **(3) Characterization**

Single-crystal X-ray diffraction of  $(CH_3)_4NMnCl_3$  crystals were selected and on a SuperNova AtlasS2 diffractometer (Rigaku Oxford Diffraction). Data was collected with Cu K $\alpha$  or Mo K $\alpha$  radiation at 293 K, respectively. Using Olex2, the structure was solved with the ShelXT structure solution program using Intrinsic Phasing and refined with the ShelXL refinement package using Least Squares minimization. All non-hydrogen atoms were located in different Fourier syntheses and finally refined with anisotropic displacement parameters. All hydrogen atoms of the organic ligands were

placed by geometrical considerations and isotropically refined with fixed U values using a riding model. The phase and crystal structure of the phosphors were determined by a Bruker D8 Advance powder X-ray diffraction (Cu K $\alpha$  radiation,  $\lambda = 0.15406 \text{ \AA}$ , 40 kV, 40 mA). Their morphology and element composition were characterized by a scanning electron microscope (SEM, FEI Quanta 200) with an accompanying energy-dispersive X-ray spectroscopy (EDS). To obtain high quality SEM images, the samples should be uniformly dispersed on the silicon wafer and sprayed with gold. The excitation (PLE) and emission (PL) spectra at different temperatures were measured by a fluorescence spectrometer (Hitachi F-7000). The fluorescence decay curves were measured using an FLS1000 steady-state fluorescence spectrometer. The diffuse reflectance ultraviolet-visible (DRS) spectra were tested using a UV-Vis spectrophotometer (UV-2550, Shimadzu, Japan).

#### **(4) Fabrication of the white LED**

The warm white LEDs were fabricated by coating  $(\text{CH}_3)_4\text{NMnCl}_3:x\text{Sb}^{3+}$  with YAG:Ce $^{3+}$  commercial 460 nm LED chips. The luminescence of the white LED in the current range from 20 to 300 mA was detected on a highly accurate array spectrometer (HSP 6000).

## Figures

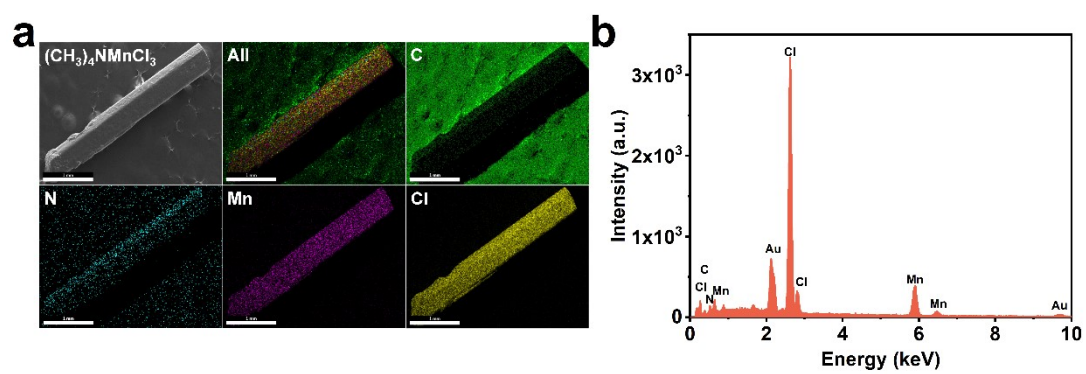

**Fig. S1** Elemental mapping images and EDS curve of  $(\text{CH}_3)_4\text{NMnCl}_3$ .

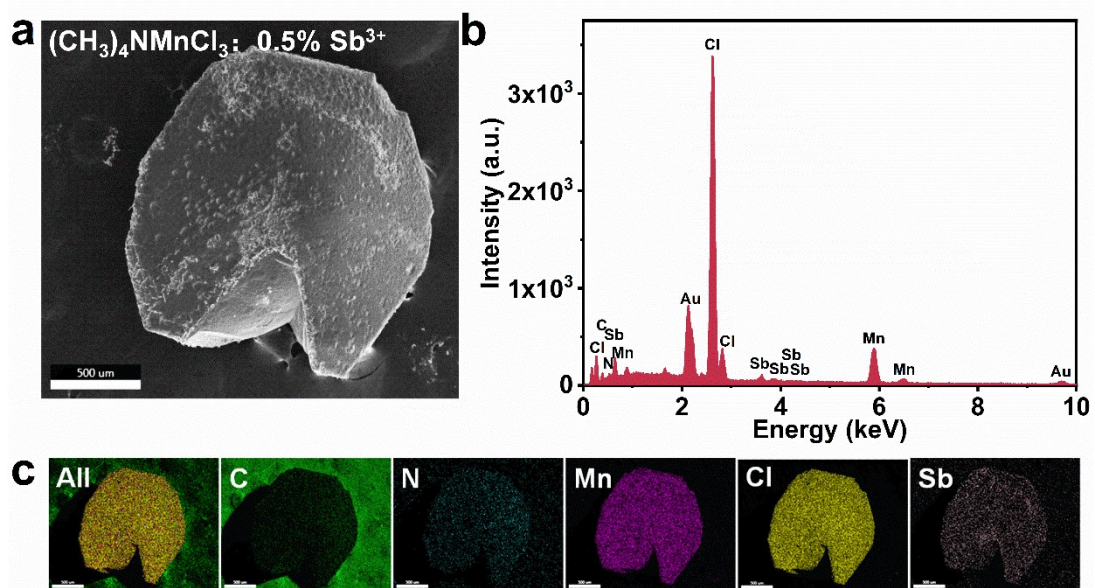

**Fig. S2** Elemental mapping images and EDS curve of  $(\text{CH}_3)_4\text{NMnCl}_3: 0.5\% \text{Sb}^{3+}$ .

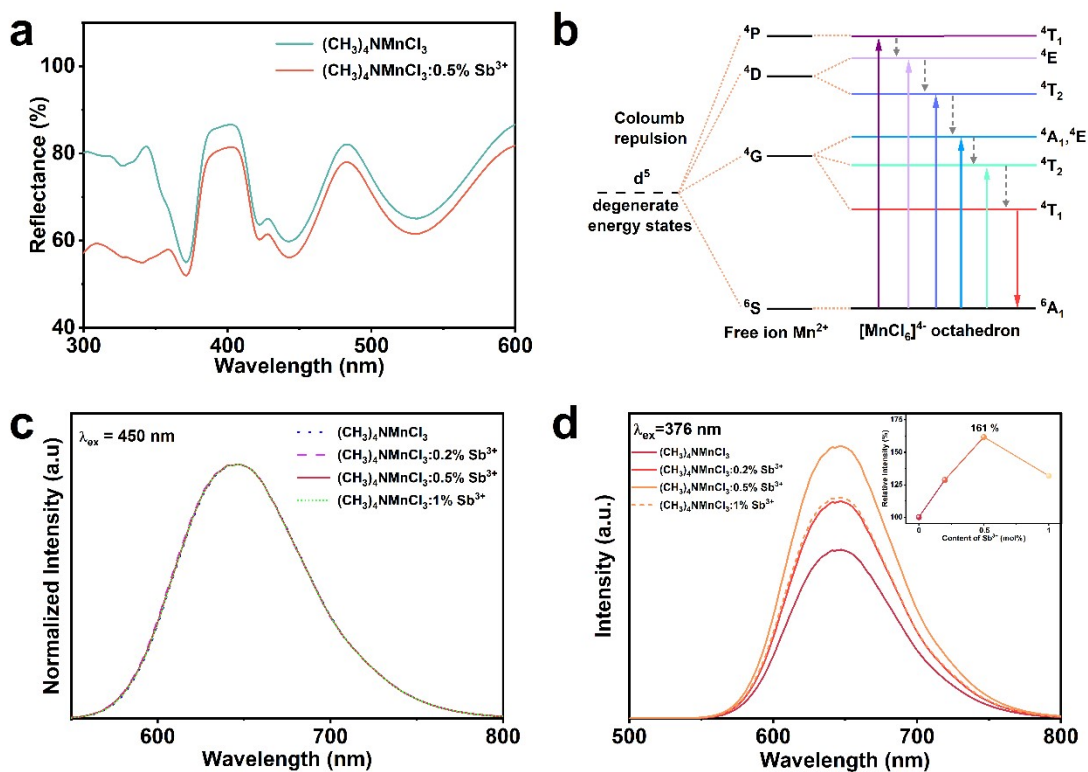

**Fig. S3** (a) DR spectra of (CH<sub>3</sub>)<sub>4</sub>NMnCl<sub>3</sub> and (CH<sub>3</sub>)<sub>4</sub>NMnCl<sub>3</sub>:0.5%Sb<sup>3+</sup>, (b) The schematic diagram showing the energy absorption, non-radiative relaxation, and radiative transition processes of Mn<sup>2+</sup> in (CH<sub>3</sub>)<sub>4</sub>NMnCl<sub>3</sub>; (c) PL spectra of (CH<sub>3</sub>)<sub>4</sub>NMnCl<sub>3</sub>:xSb<sup>3+</sup> under 376 nm excitation; (d) Normalized PL spectra of (CH<sub>3</sub>)<sub>4</sub>NMnCl<sub>3</sub>:xSb<sup>3+</sup> under 450 nm excitation.

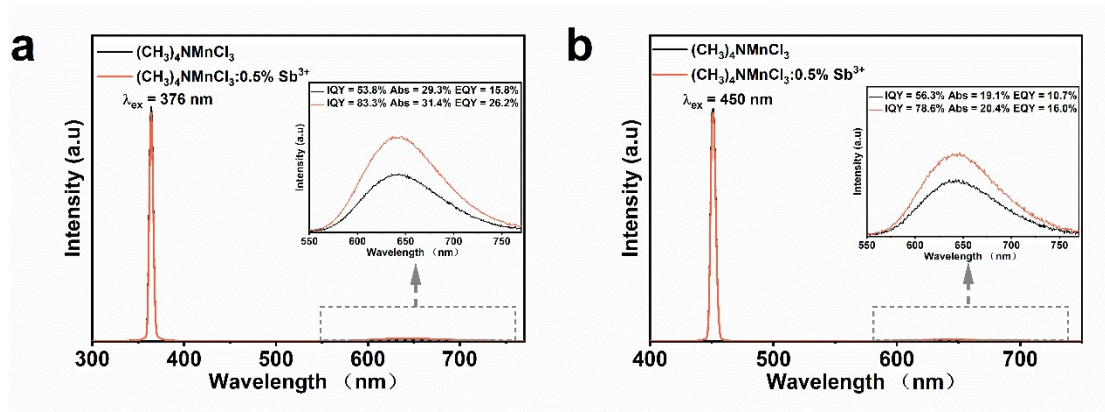

**Fig. S4** PLQY plots of  $(\text{CH}_3)_4\text{NMnCl}_3$  and  $(\text{CH}_3)_4\text{NMnCl}_3:0.5\% \text{Sb}^{3+}$  crystals (a,  $\lambda_{\text{ex}} = 376 \text{ nm}$ ; b,  $\lambda_{\text{ex}} = 450 \text{ nm}$ ).

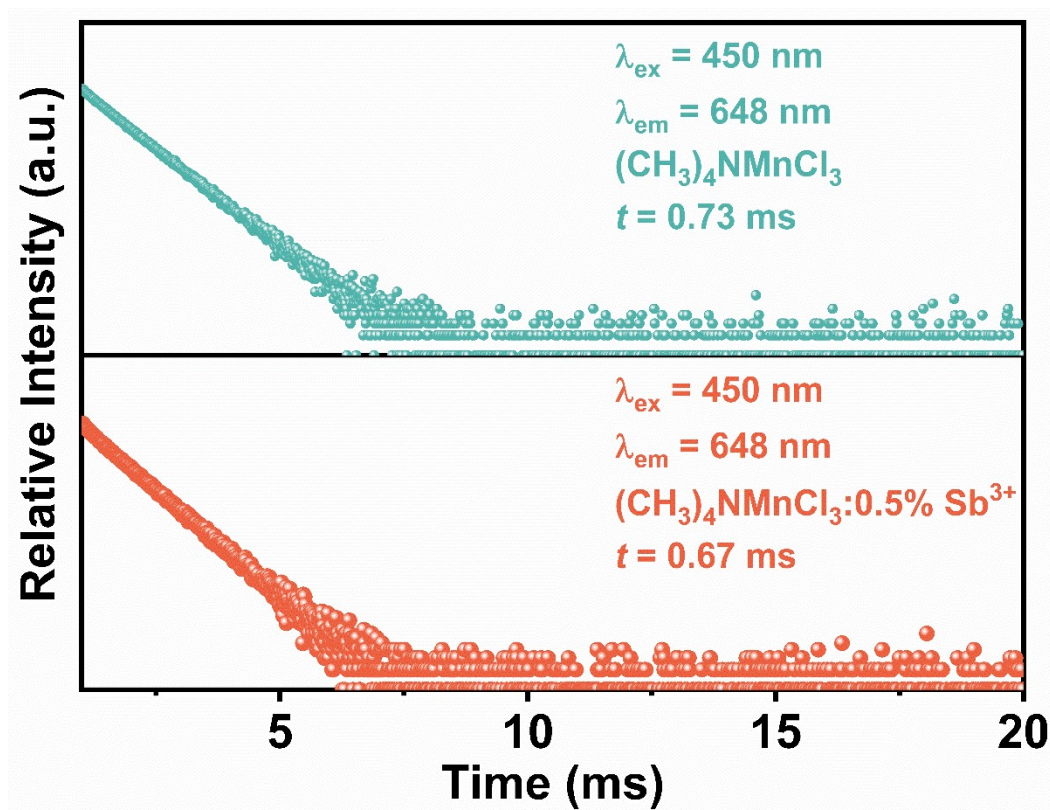

Fig. S5 PL decay curves of  $(\text{CH}_3)_4\text{NMnCl}_3$  and  $(\text{CH}_3)_4\text{NMnCl}_3:0.5\% \text{Sb}^{3+}$  crystals ( $\lambda_{\text{ex}} = 450 \text{ nm}$ ,  $\lambda_{\text{em}} = 648 \text{ nm}$ ).



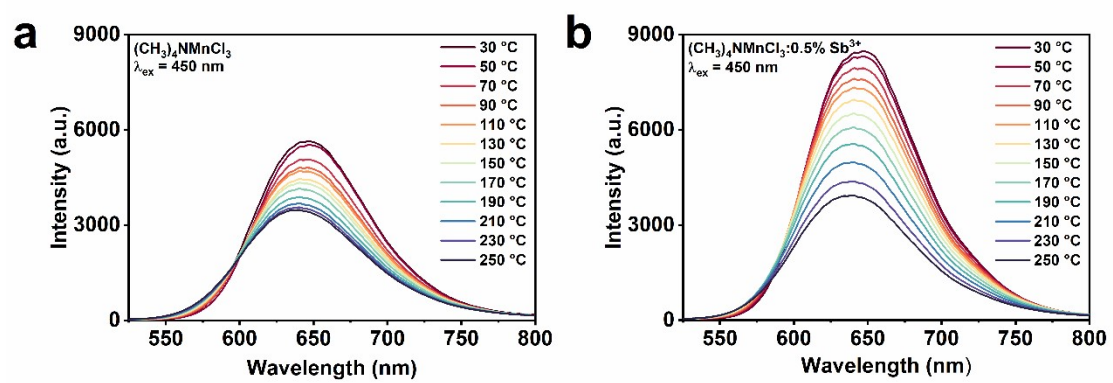

**Fig. S6** Temperature-dependent emission spectra of (a)  $(\text{CH}_3)_4\text{NMnCl}_3$  and (b)  $(\text{CH}_3)_4\text{NMnCl}_3:0.5\% \text{ Sb}^{3+}$

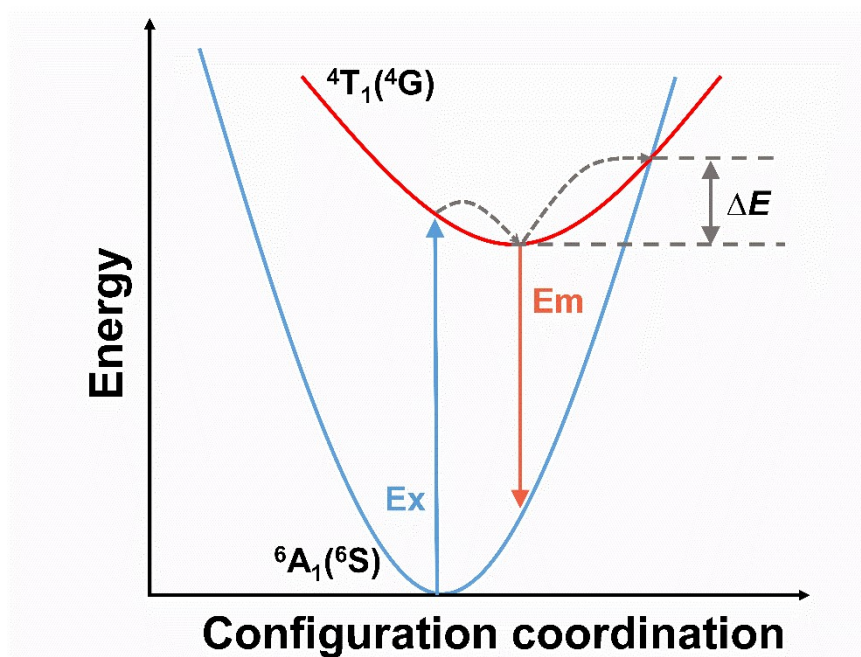

**Fig. S7** Configurational coordination diagram showing the thermal quenching of  $Mn^{2+}$  emission

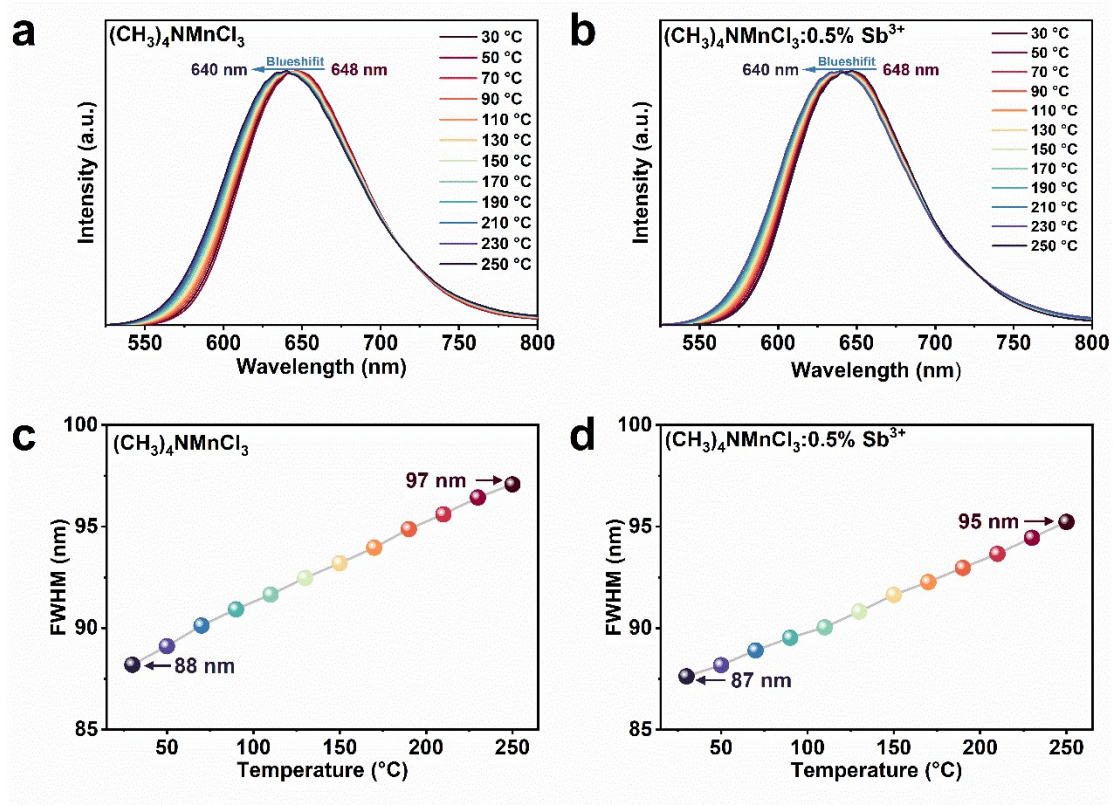

**Fig. S8** (a, b) Normalized Temperature-dependent emission spectra of  $(\text{CH}_3)_4\text{NMnCl}_3$  and  $(\text{CH}_3)_4\text{NMnCl}_3:0.5\% \text{Sb}^{3+}$ ; (c, d) Plots of FWHM as a function of temperature.

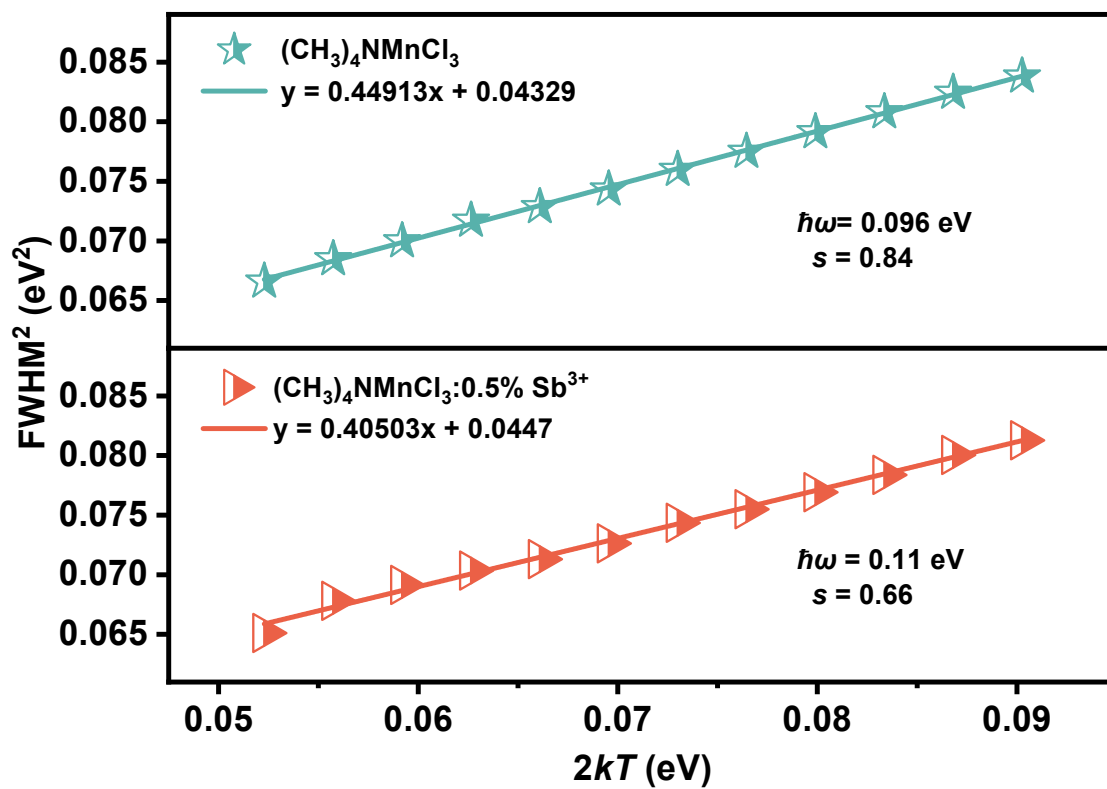

Fig. S9 Plots of  $\text{FWHM}^2$  as a function of  $2kT$

**Table S1.** Crystal structure parameters of (CH<sub>3</sub>)<sub>4</sub>NMnCl<sub>3</sub>.

| Formula                                                     | (CH <sub>3</sub> ) <sub>4</sub> NMnCl <sub>3</sub>                          |
|-------------------------------------------------------------|-----------------------------------------------------------------------------|
| Temperature (K)                                             | 293                                                                         |
| M <sub>r</sub>                                              | 235.44                                                                      |
| Crystal system                                              | hexagonal                                                                   |
| Space group                                                 | P6 <sub>3</sub> /m                                                          |
| <i>a</i> (Å)                                                | 9.1513                                                                      |
| <i>b</i> (Å)                                                | 9.1513                                                                      |
| <i>c</i> (Å)                                                | 6.4962                                                                      |
| $\alpha$ (deg)                                              | 90                                                                          |
| $\beta$ (deg)                                               | 90                                                                          |
| $\gamma$ (deg)                                              | 120                                                                         |
| <i>V</i> (Å <sup>3</sup> )                                  | 471.15                                                                      |
| <i>Z</i>                                                    | 2                                                                           |
| $\rho_{\text{calc}}$ (g cm <sup>-3</sup> )                  | 1.660                                                                       |
| $\mu/\text{mm}^{-1}$                                        | 18.619                                                                      |
| <i>F</i> (000)                                              | 238.0                                                                       |
| Crystal size/mm <sup>3</sup>                                | 0.15 × 0.04 × 0.03                                                          |
| Radiation                                                   | CuK $\alpha$ ( $\lambda$ = 1.54184)                                         |
| 2 $\theta$ range for data collection/°                      | 11.164 to 145.228                                                           |
| Index ranges                                                | -11 ≤ <i>h</i> ≤ 10, -11 ≤ <i>k</i> ≤ 11, -8 ≤ <i>l</i> ≤ 7                 |
| Reflections collected                                       | 2776                                                                        |
| Independent reflections                                     | 338 [ <i>R</i> <sub>int</sub> = 0.0493, <i>R</i> <sub>sigma</sub> = 0.0199] |
| Data/restraints/parameters                                  | 338/73/58                                                                   |
| GOF on <i>F</i> <sup>2</sup>                                | 1.106                                                                       |
| <i>R</i> <sub>1</sub> [ <i>I</i> > 2 $\sigma$ ( <i>I</i> )] | <i>R</i> <sub>1</sub> = 0.0391, <i>wR</i> <sub>2</sub> = 0.0933             |
| <i>wR</i> <sub>2</sub> (all data)                           | <i>R</i> <sub>1</sub> = 0.0413, <i>wR</i> <sub>2</sub> = 0.0974             |

**Table S2.** Fractional Atomic Coordinates ( $\times 10^4$ ) and Equivalent Isotropic Displacement Parameters ( $\text{\AA}^2 \times 10^3$ ) for  $\text{C}_4\text{H}_{12}\text{Cl}_3\text{MnN}$ .  $U_{eq}$  is defined as 1/3 of the trace of the orthogonalised  $U_{IJ}$  tensor.

| <b>Atom</b> | <b><i>x</i></b> | <b><i>y</i></b> | <b><i>z</i></b> | <b><i>U(eq)</i></b> |
|-------------|-----------------|-----------------|-----------------|---------------------|
| <b>Mn 1</b> | 0               | 1000            | 1000            | 30.6(4)             |
| <b>Cl 1</b> | 982.6(11)       | 8501.2(10)      | 7500            | 38.3(4)             |
| <b>N 1</b>  | 3270(30)        | 6650(20)        | 2500(20)        | 35.1(14)            |
| <b>C 1</b>  | 3600(30)        | 5250(30)        | 2930(60)        | 54(7)               |
| <b>C 2</b>  | 4310(30)        | 8090(30)        | 3880(30)        | 64(6)               |
| <b>C 3</b>  | 1470(30)        | 6060(30)        | 2900(60)        | 55(8)               |
| <b>C 4</b>  | 3680(50)        | 7180(30)        | 330(20)         | 78(8)               |

**Table S3.** Anisotropic Displacement Parameters ( $\text{\AA}^2 \times 10^3$ ) for  $(\text{CH}_3)_4\text{NMnCl}_3$ . The

Anisotropic displacement factor exponent takes the form: -

$$2\pi^2[h^2a^2U_{11}+2hka^*b^*U_{12}+\dots].$$

| Atom        | $U_{11}$ | $U_{22}$ | $U_{33}$ | $U_{23}$ | $U_{13}$ | $U_{12}$ |
|-------------|----------|----------|----------|----------|----------|----------|
| <b>Mn 1</b> | 34.7(4)  | 34.7(4)  | 22.4(6)  | 0        | 0        | 17.4(2)  |
| <b>Cl 1</b> | 49.6(5)  | 43.8(5)  | 31.7(6)  | 0        | 0        | 31.0(4)  |
| <b>N 1</b>  | 35(7)    | 38(6)    | 40(3)    | 1(8)     | 3(8)     | 24(6)    |
| <b>C 1</b>  | 62(9)    | 55(10)   | 52(15)   | 8(10)    | 19(9)    | 35(7)    |
| <b>C 2</b>  | 60(11)   | 57(10)   | 54(10)   | -18(9)   | -1(9)    | 13(9)    |
| <b>C 3</b>  | 26(8)    | 78(12)   | 49(16)   | -13(10)  | 8(9)     | 16(7)    |
| <b>C 4</b>  | 77(13)   | 70(13)   | 61(9)    | 25(9)    | 3(12)    | 17(9)    |

**Table S4.** Selected bond lengths and bond angles of (CH<sub>3</sub>)<sub>4</sub>NMnCl<sub>3</sub>.

| <b>Bond</b>            | <b>Length (Å)</b> | <b>Bond</b>                               | <b>Angle (°)</b> |
|------------------------|-------------------|-------------------------------------------|------------------|
| Mn 1-Cl 1 <sup>1</sup> | 2.5614(6)         | Cl 1 <sup>1</sup> -Mn 1-Cl 1 <sup>2</sup> | 180.0            |
| Mn 1-Cl 1 <sup>2</sup> | 2.5614(6)         | Cl 1 <sup>3</sup> -Mn 1-Cl 1 <sup>4</sup> | 180.0            |
| Mn 1-Cl 1 <sup>3</sup> | 2.5614(6)         | Cl 1 <sup>1</sup> -Mn 1-Cl 1 <sup>4</sup> | 84.086(15)       |
| Mn 1-Cl 1              | 2.5614(6)         | Cl 1 <sup>5</sup> -Mn 1-Cl 1 <sup>4</sup> | 84.086(15)       |
| Mn 1-Cl 1 <sup>4</sup> | 2.5614(6)         | Cl 1 <sup>5</sup> -Mn 1-Cl 1 <sup>3</sup> | 95.914(15)       |
| Mn 1-Cl 1 <sup>5</sup> | 2.5614(6)         | Cl 1 <sup>3</sup> -Mn 1-Cl 1              | 84.086(15)       |
| N 1-C 1                | 1.476(10)         | Cl 1 <sup>1</sup> -Mn 1-Cl 1 <sup>3</sup> | 95.914(15)       |
| N 1-C 4                | 1.478(10)         | Cl 1 <sup>1</sup> -Mn 1-Cl 1 <sup>5</sup> | 84.086(15)       |
| N 1-C 3                | 1.482(10)         | Cl 1 <sup>2</sup> -Mn 1-Cl 1 <sup>3</sup> | 84.086(15)       |
| N 1-C 2                | 1.477(11)         | Cl 1 <sup>2</sup> -Mn 1-Cl 1              | 84.086(15)       |
|                        |                   | Cl 1 <sup>4</sup> -Mn 1-Cl 1              | 95.914(15)       |
|                        |                   | Cl 1 <sup>2</sup> -Mn 1-Cl 1 <sup>5</sup> | 95.914(15)       |
|                        |                   | Cl 1 <sup>1</sup> -Mn 1-Cl 1 <sup>1</sup> | 95.914(15)       |
|                        |                   | Cl 1 <sup>2</sup> -Mn 1-Cl 1 <sup>4</sup> | 95.914(15)       |
|                        |                   | Cl 1 <sup>5</sup> -Mn 1-Cl 1              | 180.0            |
|                        |                   | Mn 1-Cl 1-Mn 1 <sup>6</sup>               | 78.70(2)         |
|                        |                   | C 1-N 1-C 4                               | 110.1(11)        |
|                        |                   | C 1-N 1-C 3                               | 108.6(11)        |
|                        |                   | C 1-N 1-C 2                               | 109.8(11)        |
|                        |                   | C 4-N 1-C 3                               | 109.7(11)        |
|                        |                   | C 2-N 1-C 4                               | 109.9(11)        |
|                        |                   | C 2-N 1-C 3                               | 108.8(11)        |



**Table S5.** Photoelectric parameters of white LED at different currents.

| Phosphor                                                                        | Current | LE     | CIE      |          | CRI  | CCT   | LF    |
|---------------------------------------------------------------------------------|---------|--------|----------|----------|------|-------|-------|
|                                                                                 | mA      | lm/W   | <i>x</i> | <i>y</i> |      | (K)   | mW    |
| YAG:Ce <sup>3+</sup><br>+<br>(CH <sub>3</sub> ) <sub>4</sub> NMnCl <sub>3</sub> | 20      | 98.71  | 0.3721   | 0.3426   | 85.4 | 3970  | 17.5  |
|                                                                                 | 40      | 85.61  | 0.3715   | 0.3397   | 86.3 | 3964  | 33.4  |
|                                                                                 | 60      | 71.21  | 0.3717   | 0.3385   | 86.7 | 3957  | 42.8  |
|                                                                                 | 80      | 71.71  | 0.3701   | 0.3358   | 87.1 | 3974  | 61.3  |
|                                                                                 | 100     | 60.81  | 0.3696   | 0.3346   | 87.3 | 3978  | 67.2  |
|                                                                                 | 120     | 61.81  | 0.3682   | 0.3330   | 87.5 | 4014  | 81.8  |
|                                                                                 | 140     | 58.51  | 0.3673   | 0.3319   | 87.6 | 4034  | 94.3  |
|                                                                                 | 160     | 55.41  | 0.3664   | 0.3312   | 87.7 | 4065  | 103.3 |
|                                                                                 | 180     | 52.61  | 0.3659   | 0.3310   | 87.8 | 4078  | 111.4 |
|                                                                                 | 200     | 48.91  | 0.3666   | 0.3327   | 87.8 | 4069  | 117.3 |
| 220                                                                             | 45.21   | 0.3660 | 0.3332   | 87.7     | 4092 | 121.3 |       |
| 240                                                                             | 42.31   | 0.3636 | 0.3314   | 87.9     | 4167 | 126.3 |       |

**Table S6.** Photoelectric parameters of white LED-Sb different currents.

| Phosphor                                             | Current | LE     | CIE    |        | CRI  | CCT  | LF    |
|------------------------------------------------------|---------|--------|--------|--------|------|------|-------|
|                                                      | mA      | lm/W   | x      | y      |      | (K)  | mW    |
|                                                      | 20      | 107.70 | 0.3794 | 0.3528 | 85.4 | 3831 | 18.1  |
|                                                      | 40      | 97.60  | 0.3783 | 0.3512 | 85.4 | 3855 | 36.2  |
|                                                      | 60      | 93.41  | 0.3773 | 0.3499 | 85.2 | 3872 | 53.6  |
|                                                      | 80      | 84.91  | 0.3777 | 0.3507 | 85.0 | 3867 | 62.7  |
| YAG:Ce <sup>3+</sup>                                 | 100     | 87.71  | 0.3755 | 0.3478 | 85.0 | 3910 | 85.8  |
| +                                                    | 120     | 77.71  | 0.3761 | 0.3483 | 84.2 | 3891 | 89.7  |
| (CH <sub>3</sub> ) <sub>4</sub> NMnCl <sub>3</sub> : | 140     | 76.01  | 0.3743 | 0.3469 | 84.7 | 3934 | 109.3 |
| 0.5%Sb <sup>3+</sup>                                 | 160     | 76.71  | 0.3731 | 0.3457 | 84.8 | 3966 | 129.6 |
|                                                      | 180     | 70.01  | 0.3720 | 0.3451 | 84.8 | 3992 | 142.0 |
|                                                      | 200     | 69.21  | 0.3711 | 0.3444 | 84.8 | 4020 | 154.6 |
|                                                      | 220     | 68.51  | 0.3706 | 0.3440 | 84.8 | 4030 | 167.0 |
|                                                      | 240     | 61.71  | 0.3698 | 0.3436 | 84.9 | 4058 | 175.7 |
